# Supplementary figures and images for: Strain-induced phase transitions and high carrier mobility in two-dimensional Janus MGeSN2 (M = Ti, Zr, and Hf) structures: first-principles calculations
Source: Royal Society of Chemistry journal article supplement (doi:10.1039/d3cp01647a), 2023-01-01

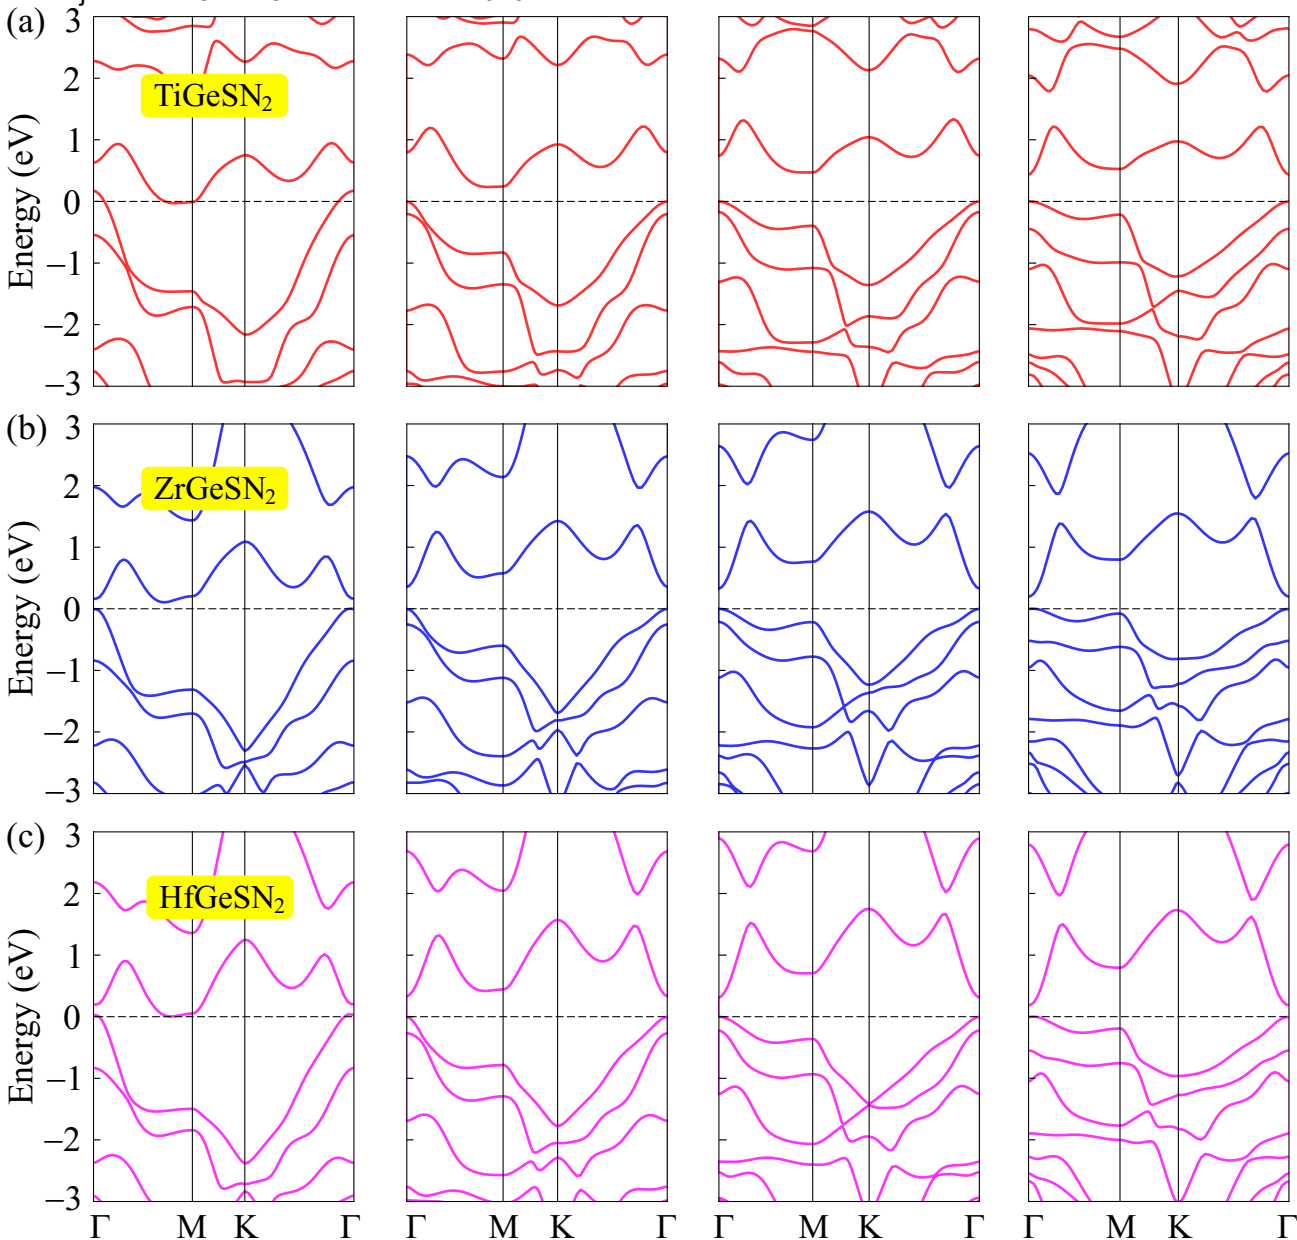

Supplement: d3cp01647a3.pdf [file d3cp01647a3.pdf]
